# Supplementary material for: Plethysmography System to Monitor the Jugular Venous Pulse: A Feasibility Study
Source: MDPI journal article supplement (doi:10.3390/diagnostics11122390), 2021-12-18
Supplement: s1 [file s1]

*Supplementary Materials*

# Plethysmography System to Monitor the Jugular Venous Pulse: A Feasibility Study

Antonino Proto <sup>1</sup>, Daniele Conti <sup>2</sup>, Erica Menegatti <sup>3</sup>, Angelo Taibi <sup>2,4,\*</sup> and Giacomo Gadda <sup>4</sup>

<sup>1</sup> Department of Cybernetics and Biomedical Engineering, VSB–Technical University of Ostrava, 17. Listopadu 2172/15, 70800 Ostrava, Czech Republic; antonino.proto@vsb.cz

<sup>2</sup> Department of Physics and Earth Sciences, University of Ferrara, Via Saragat 1, 44122 Ferrara, Italy; daniele.conti@edu.unife.it

<sup>3</sup> Department of Translational Medicine, Vascular Diseases Center, University of Ferrara, Via Aldo Moro 4, 44124 Ferrara, Italy; mngrce@unife.it

<sup>4</sup> Section of Ferrara, National Institute for Nuclear Physics (INFN), Via Saragat 1, 44122 Ferrara, Italy; gadda@fe.infn.it

\* Correspondence: taibi@fe.infn.it; Tel.: +39-0532974218

Figures S1–S4 shows the JVP waveforms in supine, sitting and upright position, with the corresponding ECG traces, for the first, third, fourth, and fifth subject, respectively.

**Citation:** Proto, A.; Conti, D.; Menegatti, E.; Taibi, A.; Gadda, G. Plethysmography System to Monitor the Jugular Venous Pulse: A Feasibility Study. *Diagnostics* **2021**, *11*, x. <https://doi.org/10.3390/xxxxx>

Academic Editor: Gino Seravalle  
Seravalle

Received: 12 November 2021

Accepted: 14 December 2021

Published: 18 December 2021

**Publisher's Note:** MDPI stays neutral with regard to jurisdictional claims in published maps and institutional affiliations.

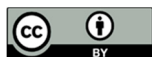

**Copyright:** © 2021 by the authors. Licensee MDPI, Basel, Switzerland. This article is an open access article distributed under the terms and conditions of the Creative Commons Attribution (CC BY) license (<https://creativecommons.org/licenses/by/4.0/>).

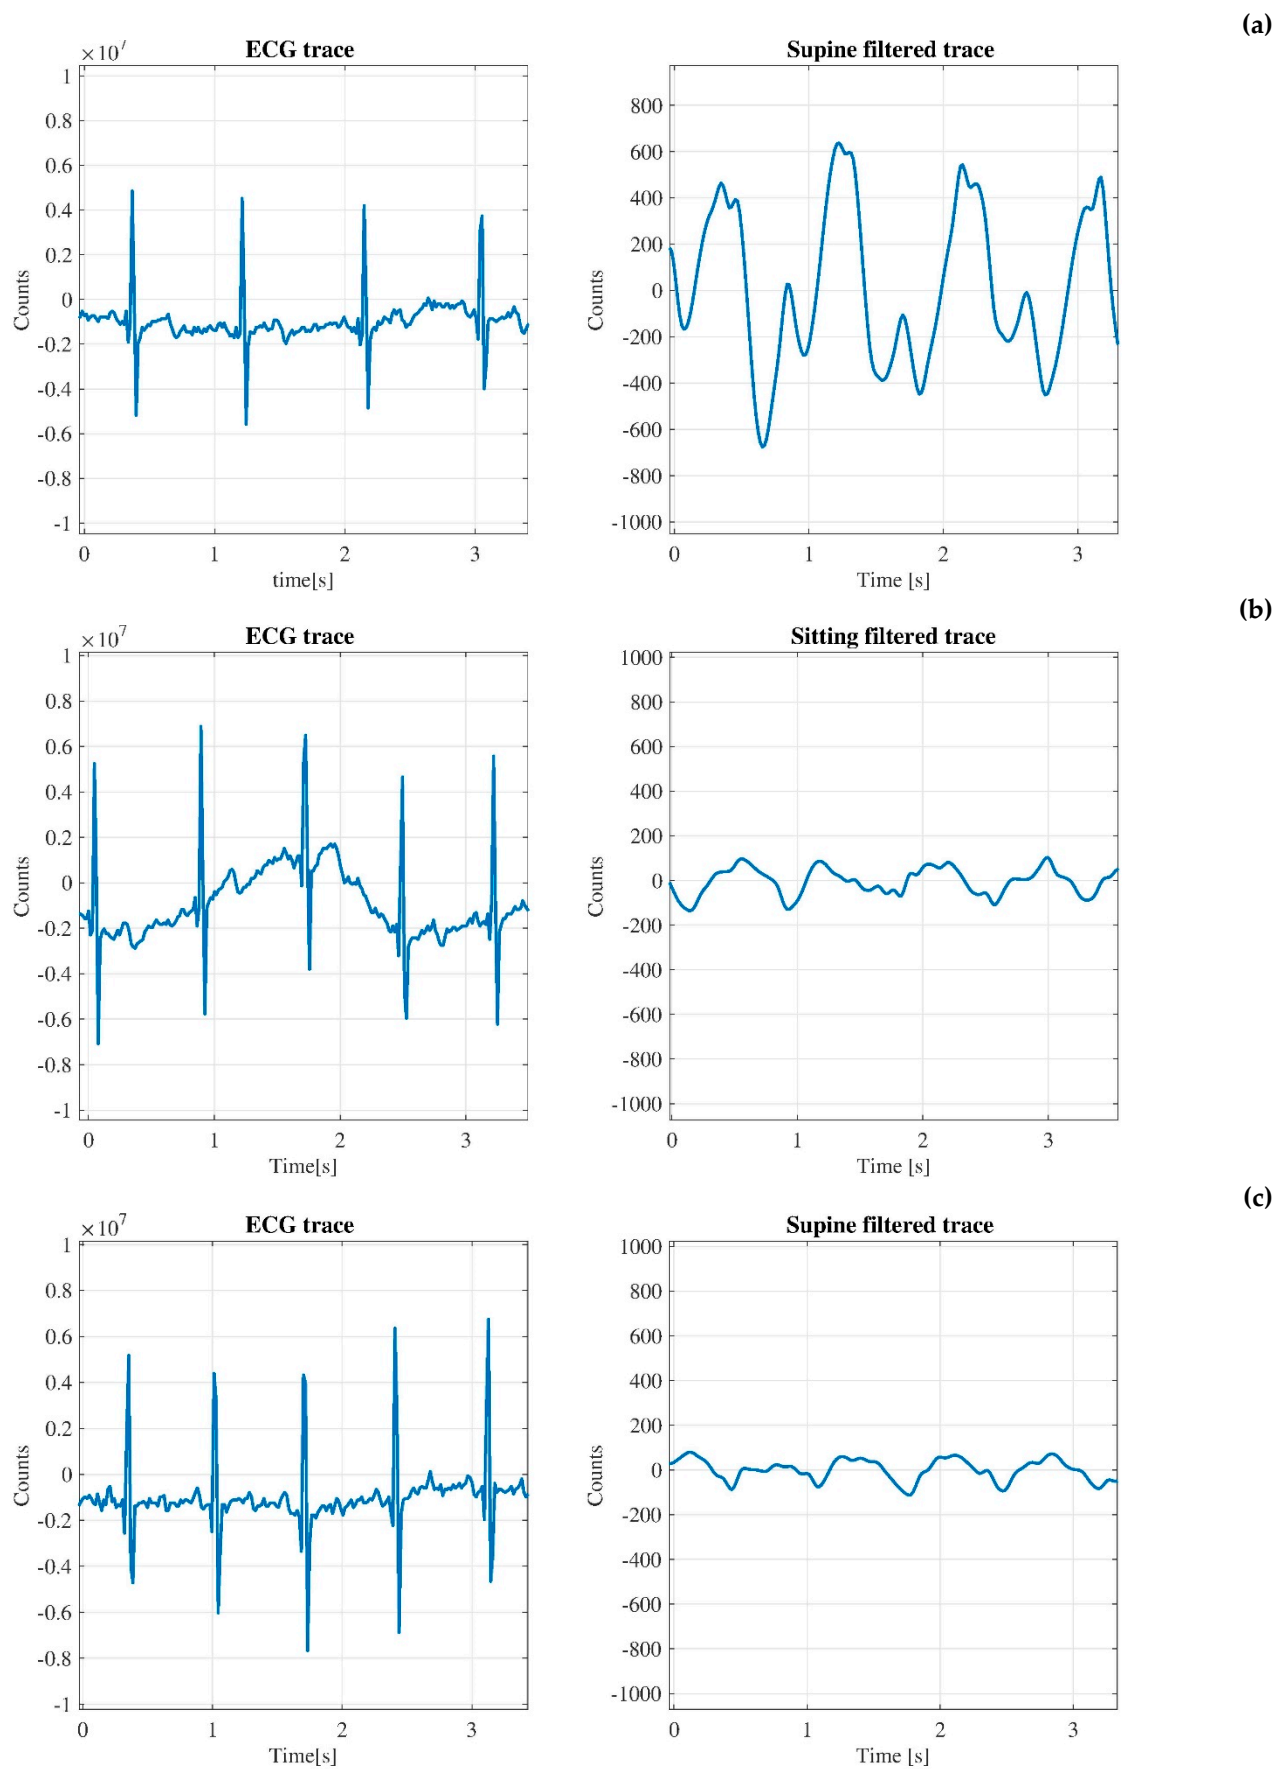

**Figure S1.** JVP waveform with the corresponding ECG trace for the subject 1 in supine position (a); sitting position (b); upright position (c).

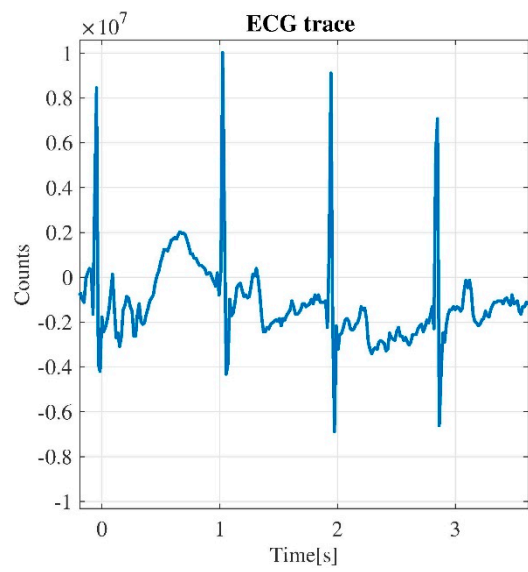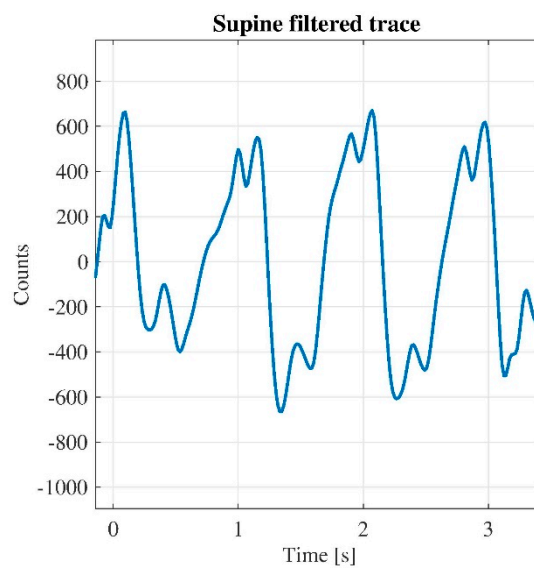

(a)

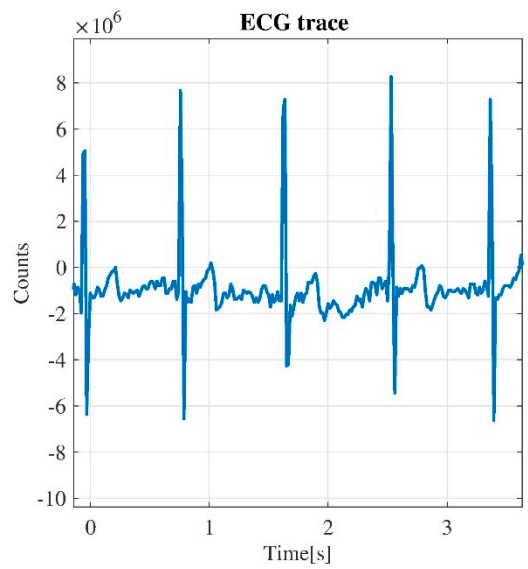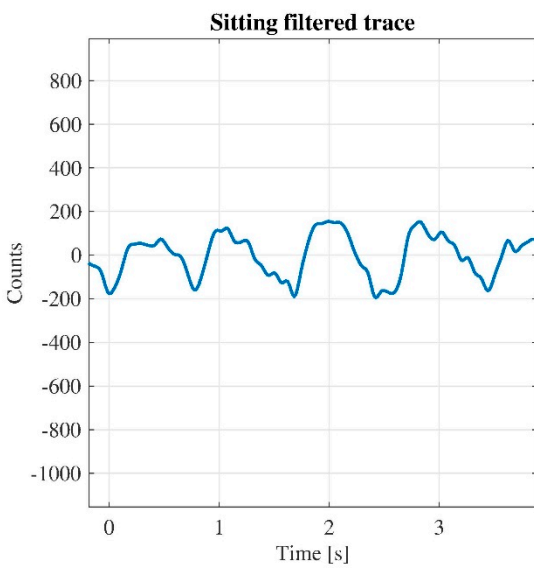

(b)

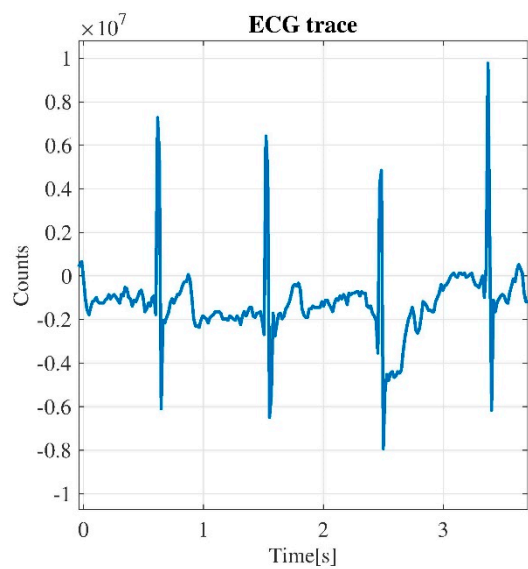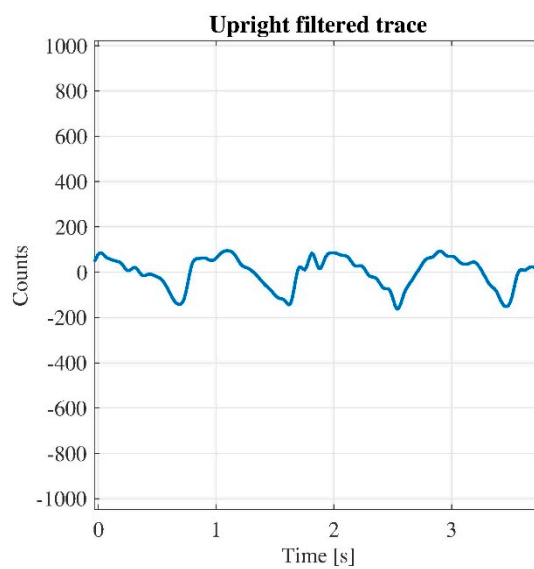

(c)

**Figure S2.** JVP waveform with the corresponding ECG trace for the subject 3 in supine position (a); sitting position (b); upright position (c).

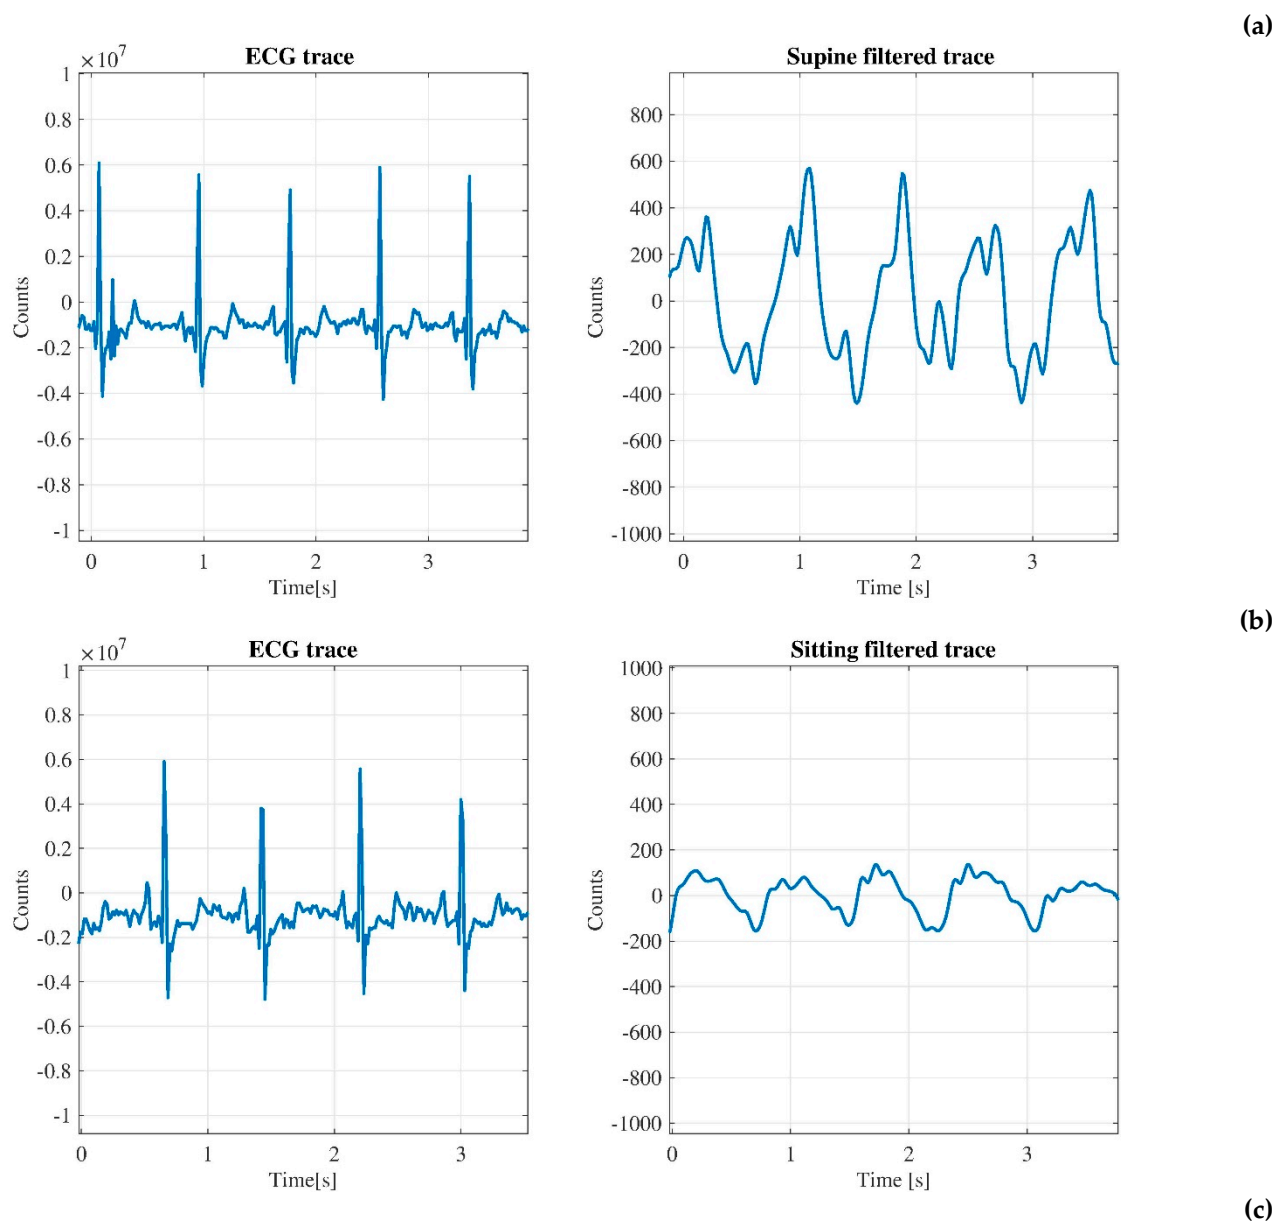

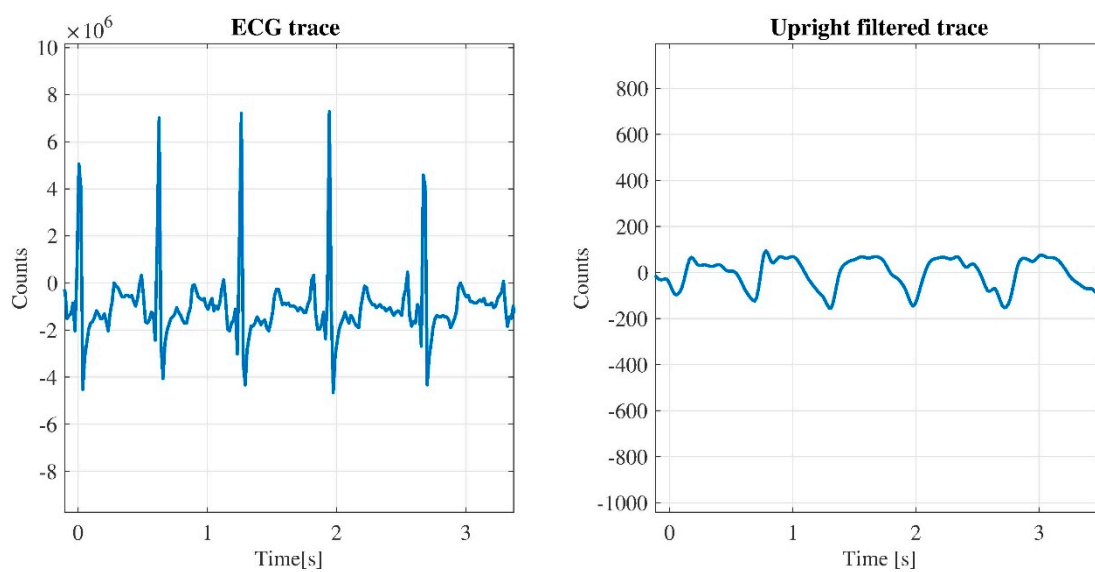

**Figure S3.** JVP waveform with the corresponding ECG trace for the subject 4 in supine position (a); sitting position (b); upright position (c).

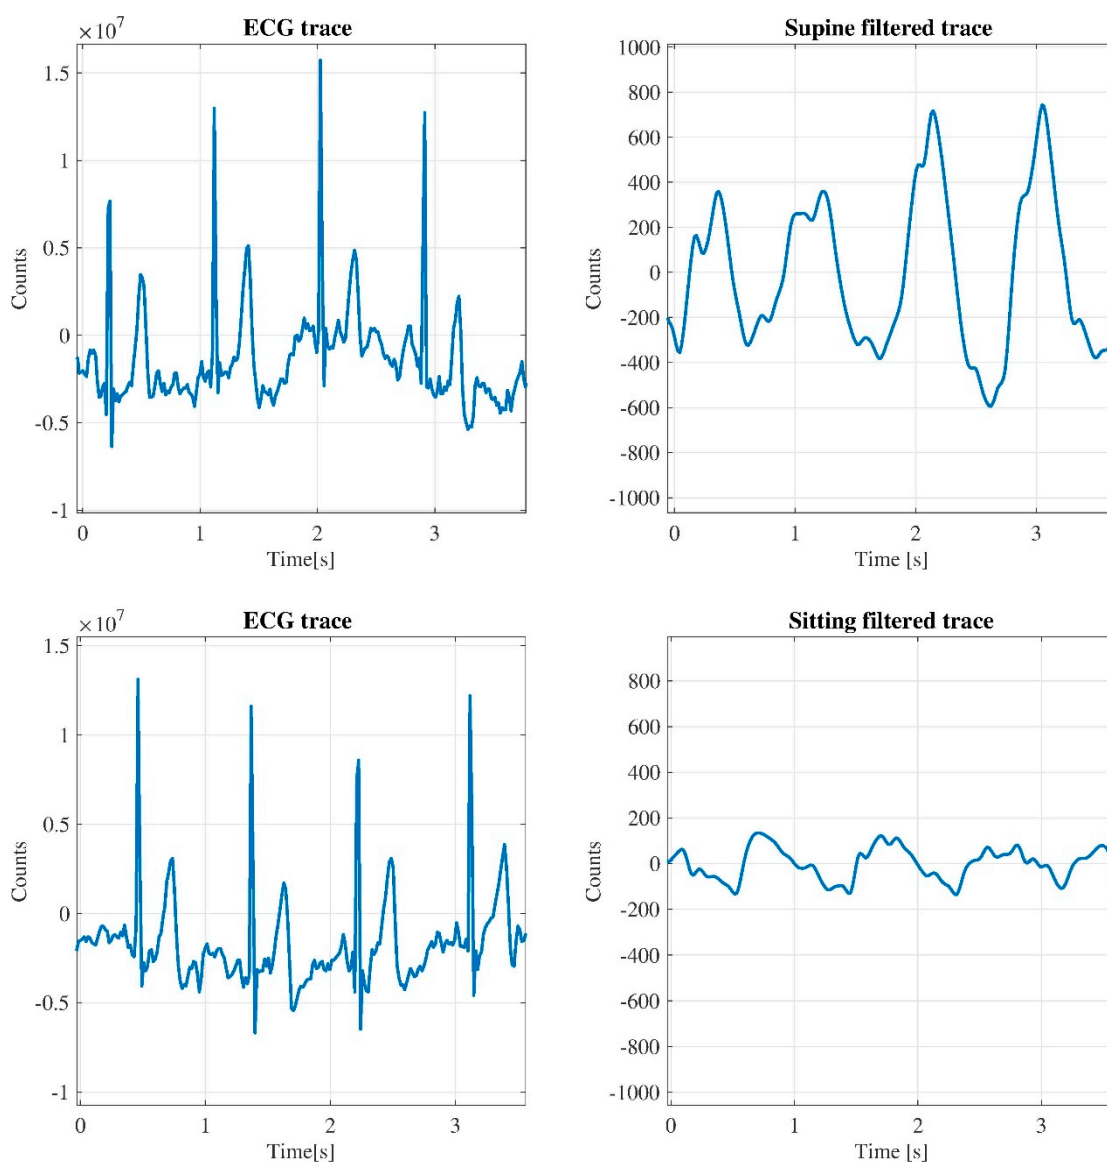

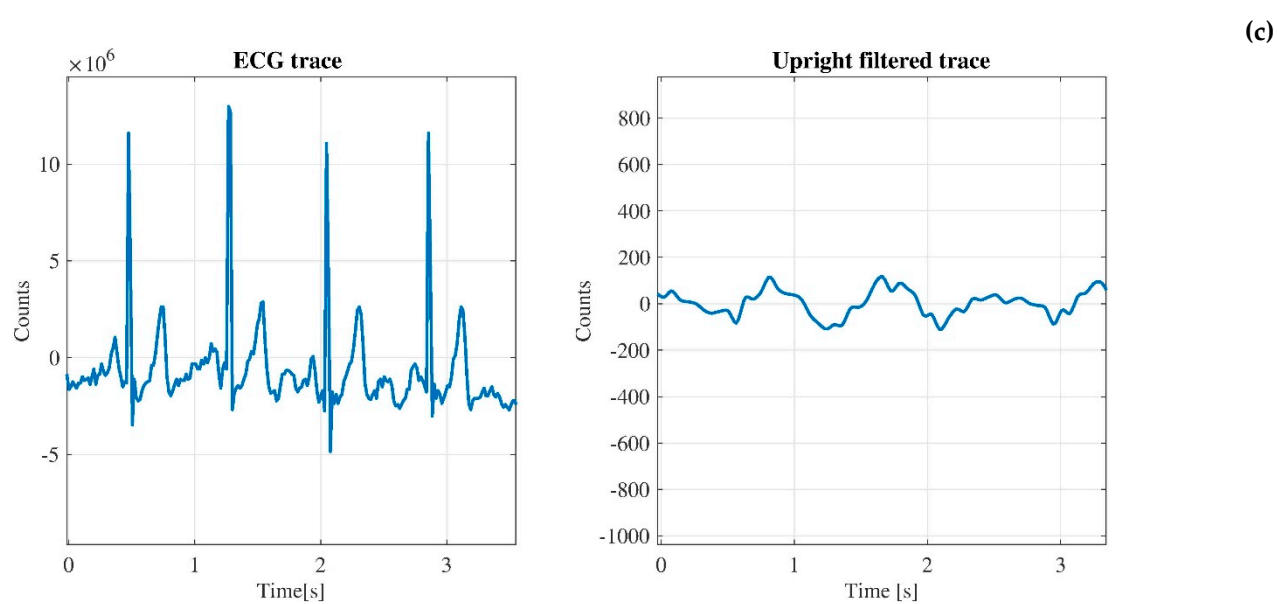

**Figure S4.** JVP waveform with the corresponding ECG trace for the subject 5 in supine position (a); sitting position (b); upright position (c).
